# Supplementary material
Source: PubMed Central journal article supplement (PMC1397720)
Supplement: bmj_332_7541_584__1.pdf [file bmj_332_7541_584__1.pdf]

# Clinical review article: Atopic and non-atopic eczema and its management

Sara Brown and Nick J Reynolds

Department of Dermatology, Royal Victoria Infirmary and Dermatological Sciences, Medical School, University of Newcastle upon Tyne, Newcastle upon Tyne, UK.

Address correspondence to: Prof N J Reynolds  
School of Clinical and Laboratory Sciences  
Medical School  
Framlington Place  
Newcastle upon Tyne NE2 4HH  
UK Tel: 0191 222 8936  
Fax: 0191 222 7094  
E Mail: [N.J.Reynolds@ncl.ac.uk](mailto:N.J.Reynolds@ncl.ac.uk)

The Corresponding Author has the right to grant on behalf of all authors and does grant on behalf of all authors, an exclusive licence (or non exclusive for government employees) on a worldwide basis to the BMJ Publishing Group Ltd to permit this article (if accepted) to be published in BMJ editions and any other BMJ PGL products and sublicences such use and exploit all subsidiary rights, as set out in our licence [<http://bmj.com/advice/copyright.shtml>].

## Methods

The following sources of information were used to write this review:

- PubMed search using the key words 'atopic eczema', 'atopic dermatitis', 'incidence', 'genetics', 'pathogenesis', 'treatment' and 'management'. Preference was given to original articles published in the last 3 years and recent review articles published in high-impact journals.
  - Search of the following Cochrane Library Databases: Cochrane Database of Systemic Reviews; Database of Abstracts and Reviews of Effectiveness; Cochrane Central Register of Controlled Trials.
- Personal archive of references

## Introduction

Atopic eczema is a chronic, relapsing, inflammatory skin condition, associated with epidermal barrier dysfunction.

This article aims to provide an up to date summary of current knowledge regarding eczema and its management. A comprehensive review of this complex and rapidly-advancing field is out-with the scope of this article and interested readers are referred to [bmj.com](http://bmj.com) web extra as well as the specialist reviews in Box 1.

### How do we define atopic eczema?

A definition based on clinical features<sup>1</sup> is shown in Box 2.

Atopic eczema and atopic dermatitis are terms that have been used synonymously, but a review committee of the World Allergy Organisation<sup>2</sup> has recommended the terminology illustrated in Box 3.

Eczema is subdivided into atopic and non-atopic eczema because a significant proportion of patients exhibit eczema without atopic features<sup>2</sup>. Children with atopic eczema are at greater risk than those with non-atopic eczema of developing asthma later in life<sup>4</sup> and their eczema more commonly persists into adulthood.<sup>2 7</sup> However, there is no evidence that atopic and non-atopic eczema respond differently to treatment and patients with non-atopic eczema may subsequently develop atopic features.

The results of future studies relating clinical features, pathogenesis and molecular genetics are eagerly awaited with the hope that a clearer understanding will lead to more accurate sub-classification of eczema.

### Why is eczema important?

Itch as a symptom is often underestimated in terms of the problems that it can cause.<sup>8 9</sup> Sleep disturbance and worries about appearance are frequently reported<sup>8</sup> as well as feelings of guilt and frustration as a consequence of a child's eczema.<sup>10</sup>

Whilst the effects of total sleep deprivation on human health are well recognised, recent studies have highlighted that recurrent, partial sleep disturbance, as often occurs in patients with atopic eczema<sup>11</sup>, also results in significant neurocognitive impairment<sup>12</sup>.

When taken together, the social/emotional and financial effects on a family looking after a child with moderate to severe eczema appear greater than caring for a child with type I diabetes<sup>13</sup>.

#### Box 1. Recommended key review articles for further reading.

- Leung DY, Boguniewicz M, Howell MD, Nomura I, Hamid QA. **New insights into atopic dermatitis.** *J Clin Invest* 2004; **113**(5): 651-7.  
This gives a detailed review on the pathophysiology of eczema and implications for new management strategies.
- Williams HC. **Atopic Dermatitis.** *N Engl J Med* 2005; **352**(22): 2314-24.  
This review is written from the perspective of a clinical scenario.
- Hoffamn S, Epplen JT. **The genetics of atopic dermatitis: recent findings and future options.** *J Mol Med* 2005; **83**: 682-92.  
This is a comprehensive review of the current knowledge regarding the genetic basis of atopic eczema.
- Cookson W. **The immunogenetics of asthma and eczema: a new focus on the epithelium.** *Nat Rev Immunol* 2004; **4**(12): 978-88.

This review discusses the immunological mechanisms of eczema, with helpful diagrammatic illustrations.

- Hoare C, Li Wan Po A, Williams H. **Systematic review of treatments for atopic eczema.** *Health Technol Assess* 2000; **4**(37).  
This document summarises the evidence available from randomised controlled trials of treatments for atopic eczema published up to 2000.

**Box 2. Definition of atopic dermatitis – the UK refinement of the Hanifin and Rajka Diagnostic Criteria<sup>1</sup>.**

In order to qualify as a case of atopic dermatitis, an individual must have:

- An itchy skin condition in the last 12 months
- Plus three or more of the following:
  1. Onset below the age of two years  
(not applicable in child under 4 years)
  2. History of flexural involvement
  3. History of generally dry skin
  4. Personal history of other atopic disease  
(or history in first-degree relative if child is under 4 years)
  5. Visible flexural dermatitis.

These diagnostic criteria have been validated in hospital<sup>1</sup> and community<sup>3</sup> settings have used in many epidemiological research studies worldwide.<sup>5 6</sup>

**Box 3. Diagrammatic illustration of the different subgroups of 'dermatitis'.**

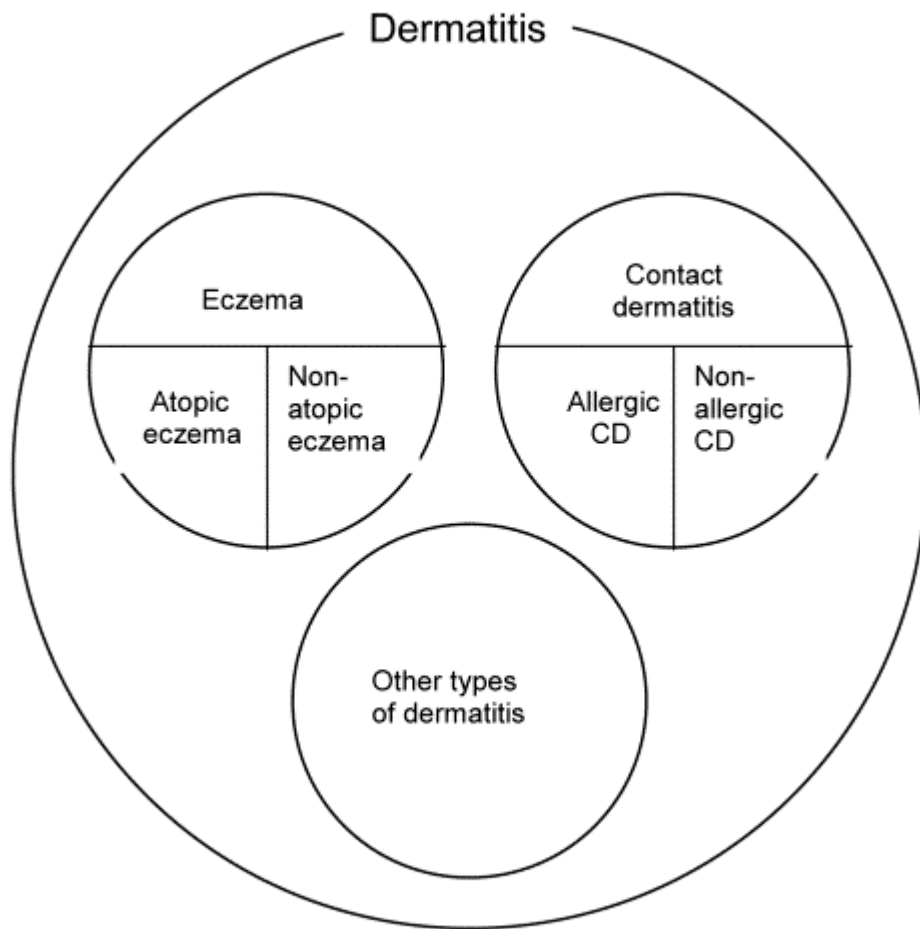

Some patients may have a combination of different types of dermatitis; this review focuses on atopic and non-atopic eczema.

Allergic CD – allergic contact dermatitis

Non-allergic CD – non-allergic contact dermatitis (irritant dermatitis)

Other types of dermatitis include nummular (discoid) eczema, photosensitive dermatitis and seborrhoeic dermatitis.

This classification is based on the World Allergy Organisation Nomenclature.<sup>2</sup>

## Clinical features of atopic eczema

- Acute and chronic or relapsing skin inflammation
- Pruritus (itch)
- Erythema (redness) and scaling in ill-defined patches
- Tiny fluid-filled vesicles - often seen in acute eczema; break-down produces weeping lesions which may dry to produce crusting
- Lichenification (thickening of the skin with an increase in skin markings) - can occur in chronic eczema because of repeated scratching

- Limb flexural involvement is characteristic but infants and adults may show predominantly facial involvement and any part of the skin surface may be affected
- Features frequently associated with atopic eczema include:
  - Xerosis (dry skin with fine scale)
  - White dermographism – scratching the skin produces a line of pallor
  - Raised serum IgE
  - Positive skin prick tests demonstrating type I (immediate) hypersensitivity
- Erythrodermic eczema is defined as greater than 90% of body surface area involvement.

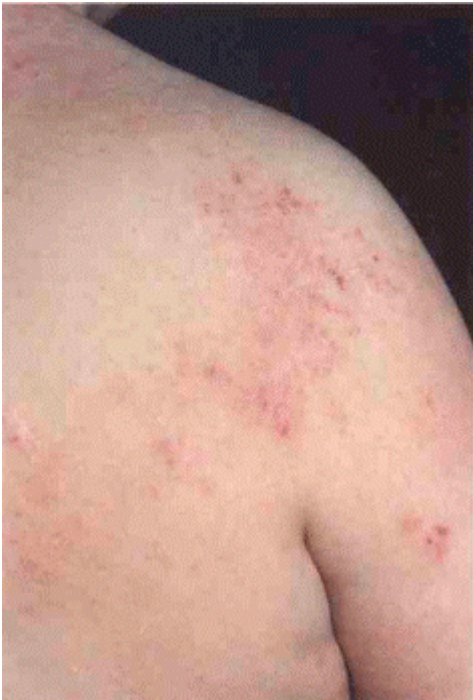

**Figure 1:** Atopic eczema on the shoulders and back, showing ill-defined patches of erythema and multiple excoriations.

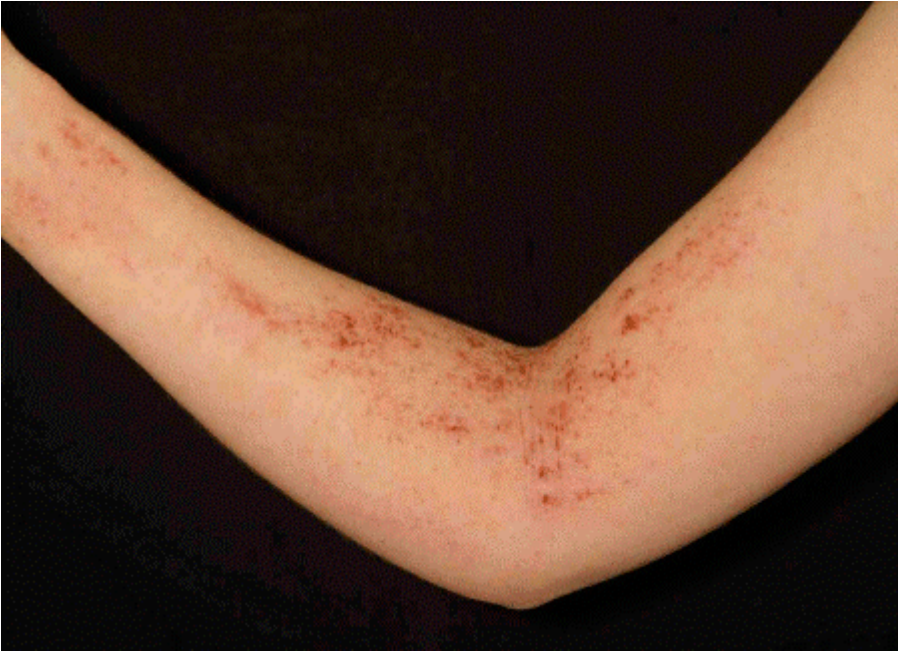

**Figure 2:** Atopic eczema on the arm flexures showing crusting associated with *Staph aureus* infection.

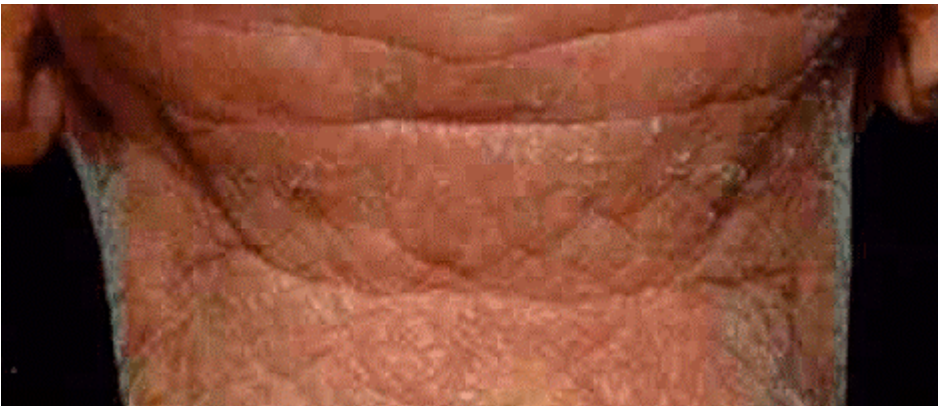

**Figure 3:** Atopic eczema on the posterior neck, showing erythema, scale and lichenification.

## Epidemiology

### Is the incidence of atopic eczema rising?

The prevalence of atopic eczema varies widely between populations with estimates of less than 2% in Chinese and Iranian children but up to 20% in northern and western Europe, Australia and the United States.<sup>14-18</sup> Many studies have demonstrated an increasing prevalence,<sup>16 19-22</sup> but some recent research has suggested stable prevalence<sup>23</sup> and incidence.<sup>24</sup>

### The importance of environmental factors

The recent increase in prevalence cannot be explained by genetic change and environmental influences must therefore play a role in phenotypic expression. Migrant studies suggest a strong link between atopic eczema and environmental factors.<sup>25</sup> A higher incidence of atopic eczema is associated with urban/industrial settings, smaller families, lower birth order and higher socioeconomic status.<sup>26</sup>

These observations have contributed to the so-called 'hygiene hypothesis' *ie* that infections early in life give protection against the development of atopic disease. Some but not all research findings support this hypothesis.<sup>27 28</sup>

Little is known about the role of dietary factors in the aetiology of eczema. A protective effect of breastfeeding has been postulated but the evidence is conflicting.<sup>6 29-31</sup> A Cochrane review concluded that there is inadequate evidence to advise women to avoid specific foods during pregnancy or breastfeeding with the aim of protecting their children from atopic diseases.<sup>32</sup>

### Pathophysiology – what do we know?

The clinical phenotype of 'eczema' has a multifactorial aetiology and the pathophysiology is incompletely understood.

### Immune dysfunction

Multiple inter-related components of the immune system have been investigated in the context of atopic eczema and shown to be dysfunctional.

- **T-lymphocytes.**

The predominance of T<sub>H</sub>2 over T<sub>H</sub>1 subtypes in the systemic immune response is thought to be responsible for the first step in the 'atopic march' of eczema leading to allergic rhinitis and asthma.<sup>33</sup> In skin there appears to be a biphasic response, with T<sub>H</sub>2 predominance in acute lesions and T<sub>H</sub>1 in the chronic phase;<sup>34</sup> the reasons for this are unclear.

The differentiation of T-helper lymphocytes from T<sub>H</sub>0 precursors is controlled by the cytokine environment at the time of interaction with antigen presenting cells<sup>35</sup> (see diagram in box 4). Compared with normal skin, biopsies of both acute and chronic atopic eczema lesions show more cells expressing messenger RNA (mRNA) for interleukin 2 (IL-2), IL-5 and IL-13.<sup>w2136 37</sup> However, chronic lesions compared to acute lesions show significantly more IL-5 and IL-12 mRNA-expressing cells and fewer IL-4 and IL-13 mRNA expressing cells.<sup>38</sup> IL-12 may be pivotal in the switch from T<sub>H</sub>2 in the acute phase to T<sub>H</sub>1 in the maintenance/chronic phase.<sup>39</sup> Preferential apoptosis of circulating memory/effector T<sub>H</sub>1 cells may contribute to the predominance of T<sub>H</sub>2 over T<sub>H</sub>1 subtypes. (Akdis, 2003)

T-regulatory cells (CD4+ CD25+ Tregs) have recently been identified as key regulators in immune processes and the maintenance of tolerance<sup>40 41</sup> and it may emerge that the focus on T<sub>H</sub>1/T<sub>H</sub>2 balance may be an over-simplification of the true situation.

## Box 4. The differentiation of T-helper lymphocytes.

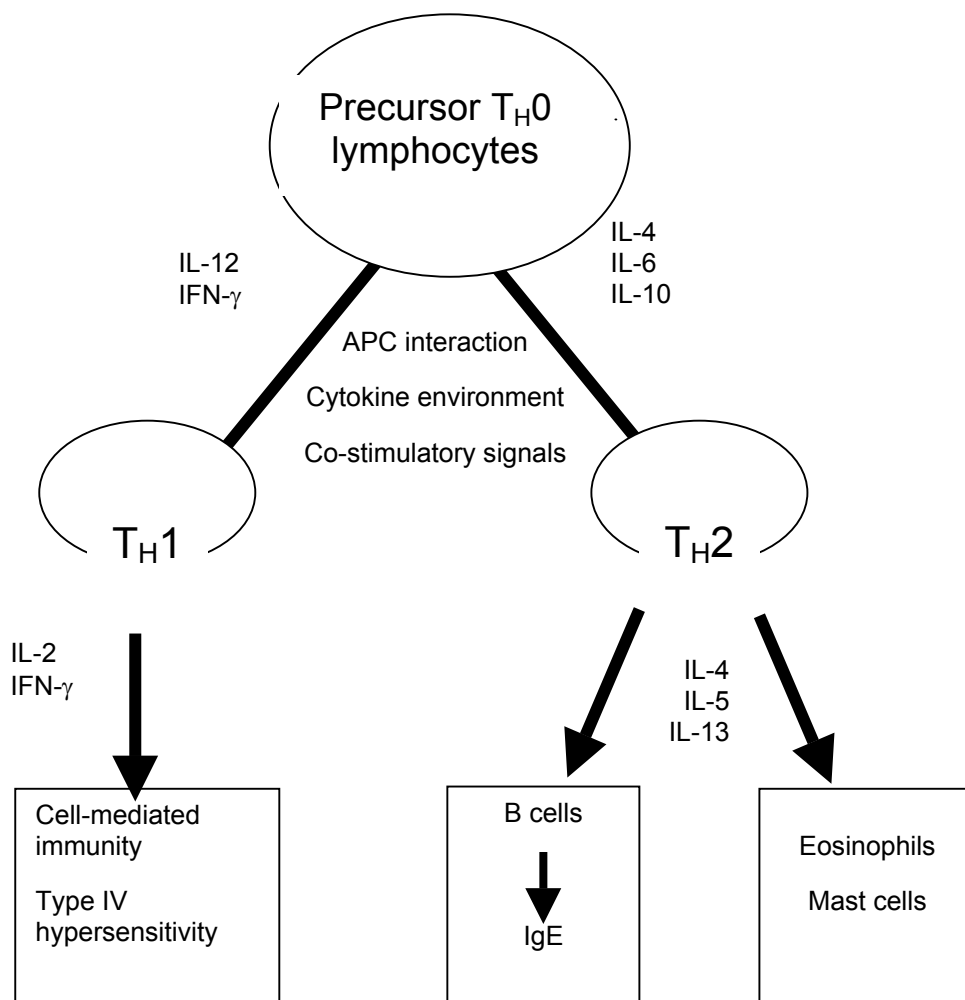

### The differentiation of T-helper (T<sub>H</sub>) lymphocytes.<sup>35</sup>

This simplified schematic diagram illustrates some important factors affecting the differentiation of T-cell subtypes:

Precursor T<sub>H0</sub> lymphocytes are able to differentiate into T<sub>H1</sub> or T<sub>H2</sub> cells. This differentiation is controlled by the presence of cytokines at the time of interaction with dendritic antigen presenting cells (APC) and their cell-surface co-stimulatory molecules.

Interleukin-12 (IL-12) is required for T<sub>H1</sub> differentiation and IL-4 drives T<sub>H2</sub> differentiation.

T<sub>H1</sub> cells produce IL-2 and interferon gamma (IFN-γ) and are effector cells in cell-mediated immunity and type IV (delayed-type) hypersensitivity.

T<sub>H2</sub> cells produce IL-4, IL-5 and IL-13. These cytokines stimulate B-cells to produce IgE and also result in the activation of eosinophils and mast cells.

- **Keratinocytes.**

Barrier function is disturbed in the clinically uninvolved skin of patients with atopic eczema as well as in the eczematous lesions. Keratinocytes are not simply inert structural components of skin; they are primary inducers of cutaneous immunological reactions<sup>42</sup> via the production of chemokines and cytokines including interferon-gamma.<sup>43 44</sup> IL-1, IL-4 and TNF-alpha induce adhesion molecules which direct lymphocytes, macrophages and eosinophils to the cutaneous site of inflammation.<sup>38 43 45</sup> There is also evidence that keratinocytes may act as 'non-professional' antigen presenting cells.<sup>42</sup> Furthermore, induction of keratinocyte apoptosis by activated T-cells through interferon-gamma and Fas appears to be an important event in the development of eczematous lesions.<sup>46</sup>



Keratinocytes produce ceramides which are important in the maintenance of the skin barrier; ceramide deficiency leads to barrier dysfunction in atopic eczema.<sup>47</sup> Keratinocytes in atopic dermatitis are also deficient in their ability to synthesize antimicrobial peptides (eg human beta-defensin and LL-37) needed for the innate immune response to microbes.<sup>43 48</sup> This may contribute to the increased susceptibility to both bacterial and viral infection.

Finally, two recently published studies showed that over-expression of the cytokine thymic stromal lymphopoietin within epidermal keratinocytes results in an eczematous skin phenotype with raised serum IgE and increased T<sub>H</sub>2 CD4<sup>+</sup> T-cells<sup>49 50</sup>. Although correlation with clinical features of atopic eczema in humans is not entirely straight forward these models illustrate that dysregulation of epidermal cytokine production can drive both cutaneous and systemic inflammation.

- **Antigen presenting cells.**

Eczematous skin shows increased levels of CD1a-positive Langerhans cells which express the high-affinity IgE receptor (FcεRI) on their surface.<sup>51</sup> This plays a role in allergen presentation to T<sub>H</sub>1 and T<sub>H</sub>2 lymphocytes.

Atopic eczema lesions also contain another population of CD1a-positive dendritic epidermal cells called inflammatory dendritic epidermal cells (IDECs) that are not found in normal skin.<sup>52</sup> IDECs express FcεRI on their surface as well as large amounts of the co-stimulatory molecules CD80 and CD86 necessary for T cell activation and proliferation. They also release pro-inflammatory cytokines (eg. IL-12, IL-18 and interferon-gamma).<sup>43</sup>

A third type of antigen presenting cells called plasmacytoid dendritic cells (pDCs) have recently been identified<sup>38</sup> which produce large amounts of IFN-α and IFN-β.<sup>53</sup> pDCs are absent from atopic eczema lesions and this may explain in part the susceptibility to viral infection (eg eczema herpeticum).

- **Eosinophils and immunoglobulin E.**

The pathological roles of allergen-specific IgE and cross-linkage in immediate hypersensitivity as well as IgE-dependent late phase reactions and IgE autoreactivity<sup>44</sup> remain controversial; some authors believe these to be important mechanisms<sup>2 38 54</sup> whilst others argue that they are simply epiphenomena.<sup>55</sup>

## Are 'allergies' important?

It is well established that immune sensitization in patients with atopic eczema occurs to common food and environmental allergens.<sup>56-58</sup> This can be demonstrated by prick testing, atopy patch testing<sup>59</sup> and the measurement of specific IgE levels. However, whether these immune reactions are of pathogenic importance in precipitating or maintaining atopic dermatitis remains controversial. For example, a placebo-controlled double-blind trial showed that various house dust mite reduction measures could improve severe atopic eczema<sup>60</sup> but this finding was not reproduced in a more recent study with similar design.<sup>61</sup>

Clinical experience suggests that food allergy is not commonly an important factor in the relapse of atopic dermatitis; in the small number of patients where food allergy is significant, this is usually obvious to the patient or their carers.<sup>56</sup>

## Non-allergic factors

- **Irritants** eg detergents disrupt the barrier function of skin and may precipitate flare-ups of pre-existing dermatitis.
- **Pruritus and scratching.** Pruritus results in scratching behaviour that causes additional damage to the skin barrier, predisposing to secondary infection. This perpetuates the so-called 'itch-scratch cycle'.
- ***Staphylococcus aureus*** is commonly isolated from eczematous lesions as well as uninvolved skin and overgrowth is associated with relapse of atopic dermatitis.<sup>62 63</sup> *S. aureus*

superantigens directly stimulate T-cell and macrophage activation;<sup>43</sup> Staph exotoxin B also induces IL-5 and IL-13 in atopic eczema.<sup>64</sup> Increased binding of *S. aureus* to skin is facilitated by T<sub>H</sub>2-mediated inflammation as well as deficiencies in antimicrobial peptides in atopic skin.<sup>43</sup>  
48 65

- **Psychological stress** may be an additional environmental stimulus perhaps through neuroimmunoregulation.<sup>66</sup> Objective investigation is clearly difficult but a recent questionnaire-based study demonstrated that patients with atopic eczema had higher anxiety levels than controls, and trait anxiety was higher than state anxiety suggesting a causal rather than resultant effect.<sup>67</sup>

## The genetic basis of atopic eczema

### The importance of genetic factors in the aetiology of atopic disease

There is strong evidence to suggest that genetic factors are important in the predisposition to atopic eczema. Twin studies show concordance rates of 0.72-0.86 in monozygotic compared with 0.21-0.23 in dizygotic twin pairs.<sup>68 69</sup> Eczema and other the atopic disorders show clustering within families.<sup>70 71</sup> Children whose parents have atopic eczema have a higher risk of developing eczema than children of parents with asthma or hay fever,<sup>72 73</sup> suggesting additional skin genes may influence the eczema phenotype.

### Eczema as a complex trait

Multiple genes interact with environmental factors and there is likely to be considerable genetic heterogeneity within the clinical phenotype of 'eczema'. The search for which genes are important in atopic eczema is ongoing.<sup>74</sup>

To date, three main approaches have been used in the search for genes responsible for atopic eczema: candidate gene association, genome-wide linkage screens and DNA microarray analysis.

### • Candidate genes

Many different genes have been studied because of their theoretical roles in the aetiology of atopic eczema; a selection is presented in table 1.

Early research focussed on the  $\beta$ -subunit of the **high-affinity IgE receptor** (FC $\epsilon$  RI- $\beta$ ).<sup>75-77</sup> Promoter polymorphisms in the **mast cell chymase gene** (CMA1) have shown associations with atopic eczema in some studies but not others<sup>78-80</sup>. Multiple candidate genes in the cytokine gene cluster on chromosome 5q31-33 have been investigated in small studies with varying methodology and few positive findings have been replicated<sup>78 81</sup>

Several genes known to be associated with asthma/atopy have been investigated for linkage with atopic eczema but surprisingly they do not appear to share the same genetic loci.<sup>78 82 83</sup>

Identification of mutations in the **SPINK5** gene (serine protease inhibitor Kazal-type 5) as the cause of Netherton's syndrome<sup>84</sup> led to the screening of this gene for polymorphisms in patients with atopic eczema, since Netherton's is characterised by an eczematous rash and elevated IgE. SPINK5 polymorphisms have been associated with atopic eczema in cohort studies from Britain,<sup>85</sup> Japan<sup>86 87</sup> and Germany<sup>88</sup> although this finding was not replicated in a recent study in Northern Germany.<sup>89</sup> SPINK5 encodes a serine protease inhibitor which is expressed in epithelial surfaces.<sup>82 90</sup> Its mechanism of action in the aetiology of eczema is as yet unknown but it may provide protection against other serine proteases which are allergenic.<sup>85</sup>

| Candidate gene                                                   | Locus         | Rationale                                                                                                                                 | Evidence                                                                                                                                                                                      | References                |
|------------------------------------------------------------------|---------------|-------------------------------------------------------------------------------------------------------------------------------------------|-----------------------------------------------------------------------------------------------------------------------------------------------------------------------------------------------|---------------------------|
| FCεR1-β<br>(high-affinity IgE receptor)                          | 11q13         | Known linkage to atopy.                                                                                                                   | Linkage of atopic eczema to 11q13 has not been consistently found.                                                                                                                            | 75-77                     |
| CMA1<br>(mast cell chymase)                                      | 14q11         | Known role of mast cell degranulation in atopy.                                                                                           | Promotor polymorphisms are associated with eczema in some studies but not all.                                                                                                                | 78-80                     |
| IL-13                                                            | 5q 31         | Produced by T <sub>H</sub> 2 cells and up-regulated in eczematous skin.                                                                   | Two functional SNPs identified with associations to eczema and atopy.                                                                                                                         | 78 81                     |
| IL-4RA<br>(α-chain of IL-4 receptor)                             | 16p11.2-12.1  | IL-4 plays a key role in the T <sub>H</sub> 2 response. The α-chain of IL-4 receptor is shared with the IL-13 receptor.                   | Several haplotypes studied but no consistent association with atopic eczema.                                                                                                                  | Reviewed in <sup>78</sup> |
| IL-12RB1<br>(IL-12 receptor β1)                                  | 5q33-34       | IL-12 promotes differentiation of the T <sub>H</sub> 1 subset, hence reduced gene transcription may favour the T <sub>H</sub> 2 response. | Promotor polymorphisms in IL-12RB1 are associated with increased risk of atopic eczema, possibly via a reduction in gene transcription.                                                       | 91                        |
| IL-18                                                            | 11q22.2–q23.3 | IL-18 enhances IL-4 and IL-13 production and hence increased IgE. Serum IL-18 increases in eczema patients when their disease is active.  | SNPs in IL-18 gene promoter regions showed association with atopic eczema in a German case-control study.                                                                                     | 92                        |
| RANTES<br>(regulated upon activation, normally T-cell expressed) | 17q11.2-q12   | Known role of T-cells in atopic eczema.                                                                                                   | Gene associated with atopic eczema but not asthma in a German study; finding not replicated in a Hungarian population.                                                                        | 93 94                     |
| SPINK5 (serine protease inhibitor Kazal-type 5)                  | 5q31          | Mutations in this gene which is near the IL-4 cytokine cluster cause Netherton's syndrome.                                                | Polymorphisms associated with atopic eczema in several cohort studies.                                                                                                                        | 85-88                     |
| NOD1<br>(nucleotide-binding oligomerisation domain protein 1)    | 7p14-p15      | NOD1 is a cytosolic receptor for a peptide found in Gram-negative bacterial cell walls.                                                   | Several polymorphisms are associated with atopic eczema and other atopic disorders.                                                                                                           | 95                        |
| SCCE<br>(stratum corneum chymotryptic enzyme)                    | 19q13         | Role in epidermal desquamation, SCCE cleaves proteins within the stratum corneum.                                                         | Screening for variations in a British case-control study has identified a 4 base-pair insertion associated with atopic eczema.                                                                | 96                        |
| ST2<br>(important receptor for T <sub>H</sub> 2 cells)           | 2q12          | ST2 expression induces preferential activation of the T <sub>H</sub> 2 response                                                           | Functional SNPs in the distal promoter region of the ST2 gene are associated with atopic dermatitis in a Japanese case control study; keratinocytes stain for ST2 expression in acute eczema. | 97                        |

**Table 2.** Candidate genes for atopic eczema, their rationale and experimental evidence. This list is not exhaustive and interested readers are referred to recent specialist reviews for greater detail.<sup>78</sup>

- **Genome-wide screens** have so far been completed in families with atopic eczema from four different populations.<sup>98-101</sup> Regions on chromosomes **3q, 3p, 17q25 and 18q** showed evidence of linkage in two or more studies, suggesting candidate regions for atopic eczema.<sup>78</sup> Interestingly, only two of these four regions have shown linkage to asthma or other atopic disorders in more than one study<sup>78</sup> indicating that separate genes may be responsible for eczema. Furthermore, the regions on **1q21, 3q21, 17q25, and 20p** linked to atopic eczema overlap with known psoriasis susceptibility loci<sup>82</sup> although a recent investigation of the 17q25 locus failed to demonstrate variants in the known PSORS2 psoriasis locus in children with atopic eczema.<sup>102</sup> The co-localisation of eczema and psoriasis genes supports the concept that specific skin genes may influence the eczema phenotype via control of epidermal function, immunity and inflammation.<sup>82</sup>

- **DNA microarray analysis**

A recent large-scale DNA microarray analysis has shown that four genes encoded on **1q21** show different levels of expression in eczema lesional skin compared with controls.<sup>103</sup> These findings suggest that epidermal differentiation complex genes may be responsible at least in part for the epidermal barrier dysfunction that is characteristic of atopic eczema. Another, independent microarray analysis<sup>104</sup> has shown an increase in the expression of genes encoding **CC chemokines** in eczematous skin, known to attract T<sub>H</sub>2 cells and eosinophils. The functional significance of other new genes and partial DNA sequences identified by DNA microarray analysis remain to be elucidated.<sup>105</sup>

## **Future research strategies**

Candidate gene studies and genome-wide screens each have their disadvantages (genome-wide screens require the collection of family material and candidate gene studies rely on the appropriate genes being chosen) and results are notoriously difficult to replicate. The discovery that eczema and other atopic disorders do not appear to share as much common genetic aetiology as was expected has paved the way for further candidate gene studies. These may focus on genes expressed locally in the skin and more specifically involved with epidermal and keratinocyte function.

In the future, **genome-wide association studies** to assess hundreds of thousands of single nucleotide polymorphisms (SNPs) across the genome should be possible. Complex statistical analytical methods will be required to interpret the vast amount of data generated by such an approach<sup>106</sup> but this strategy holds the promise of detecting unexpected links between genes and biological pathways which may lead to novel therapeutic interventions.<sup>107</sup>

## **How to treat atopic eczema**

The fluctuating course of atopic eczema and a significant placebo response highlight the need for randomised controlled trials for the evaluation of treatments or interventions. Clinical practice indicates that the management of acute weeping eczema is rather different from chronic lichenified eczema but these factors are not always discussed or included within the entry criteria of clinical trials.

## **Mild to moderate eczema: emollients and topical steroids**

Mild–moderate eczema is very common and patients are usually managed in primary care. The mainstay of treatment remains the appropriate use of emollients and topical steroids. There is a good evidence base supporting the efficacy of topical steroids<sup>108</sup>, which need only be applied once daily. Surprisingly however, there is limited evidence to support the beneficial effects of emollients<sup>108</sup> although emollients have been shown to reduce the requirements for topical steroids by up to 50%<sup>109</sup>. Short term bursts of potent topical steroid are equivalent to prolonged use of mild steroids<sup>110</sup> and prolonged use of intermittent potent steroids (2 days per week) reduced flares compared to emollient<sup>111</sup>.

The importance of a **multi-disciplinary approach** is increasingly recognised especially with respect to patient/family education including information about irritant/allergy avoidance and demonstration of topical treatments. With raised awareness about the side effects from topical steroids, patients and families may otherwise under-treat.

It is important to **recognise complications** such as secondary bacterial infection, eczema herpeticum (herpes simplex virus infection) and skin atrophy induced by the overuse of topical steroids. Indications for referral to secondary care include concern over diagnosis, a poor response to first line therapy or the development of complications.

### **Moderate to severe eczema: second line treatments**

Second line therapies for patients whose eczema has not responded to adequate topical steroids include topical calcineurin inhibitors, ultraviolet (UV) phototherapy and systemic agents. There is good evidence for the efficacy of these therapies but longer term studies to monitor safety are now required as well as comparisons between the different modalities.

#### **• Topical calcineurin inhibitors**

The discovery that systemic ciclosporin is an effective treatment for atopic eczema led to the development of topical calcineurin inhibitors, and **pimecrolimus** and **tacrolimus** have been introduced into clinical practice.

**Experimental evidence:** A recent systematic review<sup>112</sup> and meta-analysis<sup>113</sup> found limited evidence that pimecrolimus is more effective than placebo in the treatment of mild to moderate atopic eczema and that tacrolimus is more effective than placebo and mild topical steroids in the treatment of moderate to severe atopic eczema. Since then, a randomised controlled trial (RCT) involving 487 adult patients with moderate to severe atopic eczema has been published which showed that 0.1% tacrolimus was more effective than moderately potent topical steroids at achieving at least a 60% improvement at 3 months (72.6% and 52.3% respectively)<sup>114</sup>. However formal evidence is lacking for the efficacy of these agents in patients who have failed to respond to topical steroids<sup>113</sup>.

**Concern regarding side-effects:** A sensation of skin burning may be troublesome during the first weeks of therapy; the long term safety profile of topical calcineurin inhibitors is currently unknown. Post-marketing tumour adverse events in patients using topical calcineurin inhibitors combined with reports of lymphoma in non-human primates treated with systemic pimecrolimus has raised concerns. It is therefore currently recommended that topical calcineurin inhibitors are used as second line agents. According to their licence they should be prescribed by doctors with a special interest and experience in skin diseases for short term or intermediate use in patients who have had atopic eczema for >2 years and are unresponsive to conventional therapy. ([http://www.fda.gov/cder/drug/advisory/elidel\\_protopic.htm](http://www.fda.gov/cder/drug/advisory/elidel_protopic.htm)) (<http://www.nice.org.uk/page.aspx?o=219063>)<sup>115</sup>

#### **• UV phototherapy: UVB is more effective than UVA**

Patients with atopic eczema often report improvement following exposure to natural sunlight. A RCT involving 73 patients with moderate to severe atopic eczema showed that twice weekly narrow band (311nm) UVB for 12 weeks induced a 28% mean reduction in disease activity compared to a 1.3% mean reduction from exposure to visible light (placebo)<sup>116</sup>. Significant improvement was maintained at 3 months. The treatment was well tolerated but the potential increased risk of skin cancer needs to be explained to patients and monitored in the longer term.

In contrast, UV exposure from conventional sunbeds (predominantly UVA: 315-400 nm) appeared relatively ineffective. High dose UVA1 (340-400nm) improves acute severe eczema<sup>117</sup> but specialist irradiation devices are required. A further comparison of narrow-band UVB versus medium dose UVA1 indicated that narrow-band UVB was more effective<sup>118</sup>.

- **Systemic immunosuppressants: ciclosporin and azathioprine**

Moderate to severe atopic eczema may only be partially responsive to topical agents and may relapse following phototherapy necessitating consideration of systemic agents. Moderate to severe disease occurs more frequently in adults than children and ethical issues mean that the RCTs of systemic agents have principally involved adults.

#### **Oral ciclosporin**

**Experimental evidence:** The efficacy of this systemic calcineurin inhibitor in the treatment of moderate to severe atopic eczema is well established.<sup>119 120</sup> An open study in adults suggested that 6 week courses of ciclosporin resulted in long term remission of atopic eczema at 1 year<sup>121</sup> but open trials in children suggest that continuous rather than intermittent usage achieved better control.<sup>122</sup>

**Concern regarding side-effects:** Careful monitoring is required with prolonged ciclosporin use. Documented side-effects include nephrotoxicity, immunosuppression and predisposition to cancer, particularly cutaneous non-melanoma skin cancer and lymphoma. Direct evidence with respect to atopic eczema is currently confined to case reports<sup>123 124</sup>.

#### **Oral azathioprine**

**Experimental evidence:** Several open studies suggested that this purine analogue may be effective in moderate to severe disease<sup>125</sup> and this has been confirmed by two recent RCTs<sup>126 127</sup>. The results of a cross-over trial using 2.5mg/kg azathioprine showed a 25% improvement in disease activity but 35% of subjects withdrew due to side effects. Using a parallel-group design and dosing azathioprine according to thiopurinemethyltransferase (TPMT, a key enzyme in thiopurine metabolism status), Meggitt *et al* observed a larger mean improvement in disease activity (37%) and a lower drop-out rate of 15%. Sustained improvement for at least 3 months after stopping azathioprine may also occur<sup>127</sup>. In a retrospective open study, Murphy *et al* found that azathioprine resulted in a good/excellent response in 41/48 (85%) children with atopic eczema<sup>128</sup>.

**Concern regarding side-effects:** Dose-dependent nausea is the commonest side effect, followed by bone marrow and hepatic toxicity. Within the RCTs no participants developed serious laboratory abnormalities although azathioprine hypersensitivity occurred in two patients<sup>127</sup>.

Measurement of TPMT is now recommended prior to initiation of azathioprine therapy. The aim is to exclude patients who have absent TPMT activity because they are at profound risk of developing myelotoxicity<sup>129</sup> and to facilitate lower dosing in patients who have low TPMT activity<sup>127</sup>. Regular haematological monitoring is still required as polymorphisms in other enzymes may contribute up to 35% of episodes of neutropenia in patients receiving azathioprine<sup>130</sup>.

The longer term risks of azathioprine in atopic eczema are unknown but data from patients with rheumatoid arthritis and inflammatory bowel disease suggests that any risk of malignancy is small<sup>131 132</sup>.

- **Other systemic agents**

A variety of systemic immunosuppressives, immunomodulators and anti-metabolites have been reported in case series or uncontrolled trials to be of benefit in patients with moderate to severe atopic eczema.

**Mycophenolate mofetil (MMF)** is an immunosuppressive drug and its active metabolite mycophenolic acid selectively inhibits de novo purine synthesis in lymphocytes through an effect on inosine monophosphate dehydrogenase. Two open trials using 2.0g MMF per day reported improvement in disease activity of 68% median reduction and 55% mean reduction

respectively<sup>133 134</sup> whereas a third study using 2.0-2.5g daily reported no clinically relevant effect in 5 patients.

Adverse effects of MMF relate principally to its inhibitory effects on the haematopoietic and immune system including leucopenia, lymphopenia and anaemia and require appropriate monitoring but symptomatic side effects include gastro-intestinal disturbance. An increased risk of herpetic infections was reported when mycophenolic acid was originally introduced for the treatment of psoriasis<sup>135 136</sup> which may be of concern for patients with atopic eczema and indeed one patient developed herpes retinitis<sup>134</sup>.

### **Probiotics: do they help to prevent atopic eczema?**

Probiotics are live bacterial cultures of commensal gut microflora that through oral ingestion may modulate the immune system. They are readily available over the counter as bio-yoghurts, drinks and supplements. Many different bacterial strains have been used, the most common being the lactic acid bacteria lactobacilli and bifidobacteria. Their use as therapeutic agents in atopic disease is based upon the hygiene hypothesis and modulation of T<sub>H</sub>1 and T<sub>H</sub>2 responses and there is some evidence to support an effect of probiotics on TGF- $\beta$  and IL-10.

**Experimental evidence:** A placebo-controlled RCT involving 159 participants demonstrated that *Lactobacillus* GG, administered daily pre-natally to mothers for 2-4 weeks and post-natally to their infants (or breast-feeding mothers) at risk of atopic disease for 6 months, reduced the frequency of eczema from 46% to 23% at 2 years (relative risk 0.51, 95% CI 0.32-0.84), although the severity of atopic eczema and IgE reactivity was similar in the placebo and *Lactobacillus* GG groups<sup>137</sup>. A follow up study involving 107 children of 132 who completed the 2 year follow suggested a persistent beneficial effect of *Lactobacillus* GG at 4 years with respect to frequency of eczema (relative risk 0.57) but not eczema severity, allergic asthma or hay fever. Furthermore the prevalence of eczema in the placebo group was relatively high (46%).

In contrast, there is no evidence to indicate that probiotics improve established atopic eczema. Thus, for example, in a placebo-controlled RCT, two probiotic *Lactobacillus* strains did not significantly reduce the severity of eczema compared to placebo<sup>138</sup>.

### **Conclusion**

Eczema is a common and distressing condition. The aetiology and immunopathogenesis are incompletely understood and therapeutic options are at present relatively limited. It is hoped that developments in the rapidly-advancing fields of research in eczema epidemiology, pathogenesis and genetics will, in the foreseeable future, lead to the development of management strategies that are more specifically targeted to pathogenic mechanisms.

### **Acknowledgements**

We would like to thank Professor WOCM Cookson and Dr M Hannifa for critically reviewing the manuscript. We also thank Dr SJ Meggitt and Dr S Weatherhead for help in obtaining clinical photographs.

### **Conflict of interest statement**

The University of Newcastle and Prof Reynolds department have received financial support for atopic eczema research from SR pharma and Fujisawa.

## Summary points

- Atopic eczema is an itchy inflammatory skin condition with associated epidermal barrier dysfunction.
- The prevalence of atopic eczema appears to be rising but the factors responsible for this rise are incompletely understood.
- The pathophysiology of eczema involves systemic as well as cutaneous immune and epidermal dysfunction.
- Eczema is a complex trait with significant genetic and environmental influences.
- Emollients and topical steroids are the mainstay of treatment for mild-moderate eczema; moderate-severe eczema may require the addition of second-line agents such as topical or systemic calcineurin inhibitors, UV phototherapy, or systemic azathioprine.

It is expected that a clearer understanding of the genetic basis and hence pathophysiology of eczema will lead to novel therapeutic interventions in the future.

## Abbreviations:

|                      |                                                      |
|----------------------|------------------------------------------------------|
| <b>IgE</b>           | immunoglobulin E                                     |
| <b>T<sub>H</sub></b> | T-helper lymphocyte                                  |
| <b>IL</b>            | interleukin                                          |
| <b>mRNA</b>          | messenger ribonucleic acid                           |
| <b>Tregs</b>         | regulatory T-lymphocytes                             |
| <b>IDEC</b>          | inflammatory dendritic epidermal cells               |
| <b>FcεRI</b>         | high-affinity IgE receptor                           |
| <b>pDC</b>           | plasmacytoid dendritic cell                          |
| <b>IFN</b>           | interferon                                           |
| <b>APC</b>           | antigen presenting cell                              |
| <b>SNP</b>           | single nucleotide polymorphism                       |
| <b>RANTES</b>        | regulated upon activation, normally T-cell expressed |
| <b>SPINK5</b>        | serine protease inhibitor Kazal-type 5               |
| <b>NOD1</b>          | nucleotide-binding oligomerisation domain protein 1  |
| <b>SCCE</b>          | stratum corneum chymotryptic enzyme                  |

## Definitions:

- **Atopy** - a personal and/or familial tendency to become sensitised and produce IgE in response to exposure to common environmental allergens.
- **Atopic diseases** – asthma, eczema and allergic rhinitis (some authors also include food allergy).
- **Atopic march** – the observation that the development of eczema in an individual may precede the development of asthma and allergic rhinitis later in life.
- **Allergens** – antigens which cause allergy, eg proteins reacting with IgE and IgG and nickel reacting with T-cells.
- **Allergy** – a hypersensitivity reaction initiated by immunological mechanisms.
- **Hygiene hypothesis** – this postulates an inverse relationship between atopy and environmental exposure to pathogens. It is based on the theory that a cleaner microenvironment results in decreased stimulation of the immune system early in infancy thus facilitating the development of abnormal, allergic reactions.
- **Itch–scratch cycle** – the pruritus that is characteristic of eczema results in scratching behaviour which exacerbates epidermal barrier dysfunction. This increases *Staph aureus* infection which exacerbates eczema pruritus and results in more scratching and perpetuates a vicious cycle.
- **Genotype** – the genetic constitution of an organism which is modulated by the environment before being expressed as a phenotype.



- **Phenotype** – the expressed traits or characteristics of an organism as a result of the genotype and environmental influences, eg the presence/absence of a disease.
- **Polymorphism** – a segment of the genome, within or outside a gene, in which different forms (**alleles**) are present.
- **Locus** – a segment of the genome.
- **Single nucleotide polymorphism (SNP, pronounced ‘snip’)** - DNA sequence variations that occur when a single nucleotide in the genome sequence is altered. For a variation to be considered a SNP, it must occur in at least 1% of the population. SNPs make up about 90% of all human genetic variation.
- **Complex trait** – any phenotype which results from the effects of multiple genes at two or more loci, with the addition of possible environmental influences. This is in contrast to simple **Mendelian inheritance** where a single gene is responsible for defining a single phenotypic trait.
- **Candidate gene** – a known gene suspected to be associated with the disease of interest on the basis of the biological function of its protein product.
- **Genetic linkage** – the phenomenon whereby a phenotype and a gene are inherited together with a known **marker polymorphism** more often than is expected by chance alone. This indicates that the gene may be contributing partially or completely to the phenotype.
- **DNA microarray analysis** – in this technique thousands of messenger RNAs are simultaneously compared in order to investigate patterns of tissue inflammation eg within a skin biopsy sample.
- **Genetic association study** – comparison of the frequency of alleles in candidate genes between affected and unaffected individuals.
- **Whole genome scan** – linkage analysis in which markers placed at regular intervals covering the whole genome are typed.

#### **A patient’s story – Rachel aged 15 years, in her own words.**

“I have had eczema since I was born and had asthma as well. Having eczema is not really nice because some people stare and makes nasty remarks about my skin and it puts me down and it also upsets me.

When I’m at home I’m OK and happy because my family are there. When at school I’m mostly upset because people call me names like scabby and cornflake and more. My friends are really great help because they tell me to just let them people that call me names just let it blow over your head.

At home my Mam, Dad and sister helps with my treatment. And also the nurse at the hospital helps with my treatment when I have to come in. And also my antie helps with my treatment when I stay at her house.

Its nice when I have to put my cream on but when I have to put the bandages on its not nice because they are really cold and they sometimes get really tight and I just get all agravated and ichey.

I would love to go and live in a hot and sunny place so that my skin would always be nice.”

## Management of eczema – basic principles

Eczema can be a very rewarding condition to treat.

Different modes of treatment should be used simultaneously for optimal management:

- 1) Avoid irritants such as soap and detergents – use a **soap substitute**.
- 2) Apply an **emollient** after washing – greasy ointments are more effective than water-based creams unless the eczema is exuding a lot of fluid.
- 3) **Topical corticosteroid creams or ointments** - mild, moderate, potent or very potent depending on the severity of the eczema and its site.  
Facial and flexural skin is more at risk of local side-effects and special care is required in the treatment of young children.  
Ointments are more potent than creams because their occlusive effect aids tissue penetration; creams are preferable where eczema is weeping.
- 4) **Topical antiseptics and/or oral antibiotics** – when the eczema is secondarily infected. *Staph aureus* infection is commonly associated with disease flares.
- 5) Sedating **oral antihistamine** medication may be useful at night.
- 6) Occlusive **bandaging** may be helpful but objective evidence is lacking. The aim is to prevent scratching and increase the absorption of topical steroids and emollients.  
Medicated bandages containing anti-inflammatory preparations (eg zinc oxide) may also be used, but again this is based on experience rather than experimental evidence.
- 7) **Referral** to a dermatology specialist is indicated when the managements listed above do not produce adequate control or if steroid-induced dermal atrophy is a concern.
- 8) **Second-line treatments** include:
  - Topical immunosuppressants – calcineurin inhibitors
  - Ultraviolet light treatment – eg narrow band UVB
  - Systemic immunosuppressants – cyclosporin and azathioprine.

## Patient information and support groups:

- National Eczema Society [www.eczema.org](http://www.eczema.org) This organisation also provides information leaflets.
- Talk Eczema [www.talkeczema.com](http://www.talkeczema.com) A free online support service for people with eczema and their families.
- British Association of Dermatologists <http://www.bad.org.uk/public/leaflets> Information on the diagnosis and treatment of eczema and other skin conditions.

American Academy of Dermatology patient information service  
[www.aad.org/public/publications/pamphlets/eczemaatopic\\_dermatitis.htm](http://www.aad.org/public/publications/pamphlets/eczemaatopic_dermatitis.htm)

## Additional educational resources:

- The British Association of Dermatologists provides evidence-based and up-to-date information for healthcare professionals.  
<http://www.bad.org.uk/healthcare/guidelines/>
- [www.nottingham.ac.uk/dermatology/eczema/index.html](http://www.nottingham.ac.uk/dermatology/eczema/index.html) Online manual of the UK Diagnostic Criteria for atopic dermatitis.
- The National Institute for Health and Clinical Excellence (NICE) provides national guidance in England and Wales on the treatment of eczema. <http://www.nice.org.uk/search.aspx?search-mode=simple&ss=eczema>
- The American Academy of Dermatology guidelines on the management of eczema have recently been published:  
Hanifin JM, Cooper KD, Ho VC *et al.* Guidelines for care of atopic dermatitis, developed in accordance with the American Academy of Dermatology (AAD)/American Academy of Dermatology Association "Administrative Regulations for Evidence-Based Clinical Practice Guidelines." *J Am Acad Dermatol* 2004; **50**; 391-404.

## References

1. Williams HC, Burney PG, Hay RJ, Archer CB, Shipley MJ, Hunter JJ, et al. The U.K. Working Party's Diagnostic Criteria for Atopic Dermatitis. I. Derivation of a minimum set of discriminators for atopic dermatitis. *Br J Dermatol* 1994;131(3):383-396.
2. Flohr C, Johansson SG, Wahlgren CF, Williams H. How atopic is atopic dermatitis? *J Allergy Clin Immunol* 2004;114(1):150-8.
3. Williams HC, Burney PG, Pembroke AC, Hay RJ. Validation of the U.K. diagnostic criteria for atopic dermatitis in a population setting. U.K. Diagnostic Criteria for Atopic Dermatitis Working Party. *Br J Dermatol* 1996;135(1):12-17.
4. Wuthrich B, Schmid-Grendelmeier P. Natural course of AEDS. *Allergy* 2002;57(3):267-8.
5. Popescu CM, Popescu R, Williams H, Forsea D. Community validation of the United Kingdom diagnostic criteria for atopic dermatitis in Romanian schoolchildren. *Br J Dermatol* 1998;138(3):436-42.
6. Ben-Gashir MA, Seed PT, Hay RJ. Predictors of atopic dermatitis severity over time. *J Am Acad Dermatol* 2004;50(3):349-56.
7. Girolomoni G, Abeni D, Masini C, Sera F, Ayala F, Belloni-Fortina A, et al. The epidemiology of atopic dermatitis in Italian schoolchildren. *Allergy* 2003;58(5):420-5.
8. Chamlin SL, Cella D, Frieden IJ, Williams ML, Mancini AJ, Lai JS, et al. Development of the Childhood Atopic Dermatitis Impact Scale: initial validation of a quality-of-life measure for young children with atopic dermatitis and their families. *J Invest Dermatol* 2005;125(6):1106-11.
9. Johnke H, Vach W, Norberg LA, Bindslev-Jensen C, Host A, Andersen KE. A comparison between criteria for diagnosing atopic eczema in infants. *Br J Dermatol* 2005;153(2):352-8.
10. Chamlin SL, Frieden IJ, Williams ML, Chren MM. Effects of atopic dermatitis on young American children and their families. *Pediatrics* 2004;114(3):607-11.
11. Benjamin K, Waterston K, Russell M, Schofield O, Diffey B, Rees JL. The development of an objective method for measuring scratch in children with atopic dermatitis suitable for clinical use. *J Am Acad Dermatol* 2004;50(1):33-40.
12. Belenky G, Wesensten NJ, Thorne DR, Thomas ML, Sing HC, Redmond DP, et al. Patterns of performance degradation and restoration during sleep restriction and subsequent recovery: a sleep dose-response study. *J Sleep Res* 2003;12(1):1-12.
13. Kemp AS. Cost of illness of atopic dermatitis in children: a societal perspective. *Pharmacoeconomics* 2003;21(2):105-13.
14. Worldwide variation in prevalence of symptoms of asthma, allergic rhinoconjunctivitis, and atopic eczema: ISAAC. The International Study of Asthma and Allergies in Childhood (ISAAC) Steering Committee. *Lancet* 1998;351(9111):1225-32.
15. Laughter D, Istvan JA, Tofte SJ, Hanifin JM. The prevalence of atopic dermatitis in Oregon schoolchildren. *J Am Acad Dermatol* 2000;43(4):649-55.
16. Shamssain MH, Shamsian N. Prevalence and severity of asthma, rhinitis, and atopic eczema: the north east study. *Arch Dis Child* 1999;81(4):313-7.
17. Dotterud LK, Falk ES. Atopic disease among adults in Northern Russia, an area with heavy air pollution. *Acta Derm Venereol* 1999;79(6):448-50.
18. Foley P, Zuo Y, Plunkett A, Marks R. The frequency of common skin conditions in preschool-age children in Australia: atopic dermatitis. *Arch Dermatol* 2001;137(3):293-300.

19. Williams HC. Is the prevalence of atopic dermatitis increasing? *Clin Exp Dermatol* 1992;17(6):385-91.
20. Wadonda-Kabondo N, Sterne JA, Golding J, Kennedy CT, Archer CB, Dunnill MG. A prospective study of the prevalence and incidence of atopic dermatitis in children aged 0-42 months. *Br J Dermatol* 2003;149(5):1023-8.
21. Lewis-Jones S. Atopic dermatitis in childhood. *Hosp Med* 2001;62(3):136-43.
22. Annus T, Riiikjarv MA, Rahu K, Bjorksten B. Modest increase in seasonal allergic rhinitis and eczema over 8 years among Estonian schoolchildren. *Pediatr Allergy Immunol* 2005;16(4):315-20.
23. Riedi CA, Rosario NA, Ribas LF, Backes AS, Kleiniibing GF, Popija M, et al. Increase in prevalence of rhinoconjunctivitis but not asthma and atopic eczema in teenagers. *J Invest Allergol Clin Immunol* 2005;15(3):183-8.
24. Olesen AB, Bang K, Juul S, Thestrup-Pedersen K. Stable incidence of atopic dermatitis among children in Denmark during the 1990s. *Acta Derm Venereol* 2005;85(3):244-7.
25. Williams HC, Pembroke AC, Forsdyke H, Boodoo G, Hay RJ, Burney PG. London-born black Caribbean children are at increased risk of atopic dermatitis. *J Am Acad Dermatol* 1995;32(2 Pt 1):212-7.
26. Diepgen T. Is the prevalence of atopic dermatitis increasing? In: HC W, editor. *Atopic Dermatitis*. Cambridge: Cambridge University Press, 2000:96-112.
27. Flohr C, Pascoe D, Williams HC. Atopic dermatitis and the 'hygiene hypothesis': too clean to be true? *Br J Dermatol* 2005;152(2):202-16.
28. Zutavern A, Hirsch T, Leupold W, Weiland S, Keil U, von Mutius E. Atopic dermatitis, extrinsic atopic dermatitis and the hygiene hypothesis: results from a cross-sectional study. *Clin Exp Allergy* 2005;35(10):1301-8.
29. Harris JM, Cullinan P, Williams HC, Mills P, Moffat S, White C, et al. Environmental associations with eczema in early life. *Br J Dermatol* 2001;144(4):795-802.
30. Leung DY, Bieber T. Atopic dermatitis. *Lancet* 2003;361(9352):151-60.
31. Ludvigsson JF, Mostrom M, Ludvigsson J, Duchon K. Exclusive breastfeeding and risk of atopic dermatitis in some 8300 infants. *Pediatr Allergy Immunol* 2005;16(3):201-8.
32. Kramer MS, Kakuma R. Maternal dietary antigen avoidance during pregnancy and/or lactation for preventing or treating atopic disease in the child. *Cochrane Database Syst Rev* 2003(4):CD000133.
33. Hahn EL, Bacharier LB. The atopic march: the pattern of allergic disease development in childhood. *Immunol Allergy Clin North Am* 2005;25(2):231-46, v.
34. Leung DY. Atopic dermatitis: new insights and opportunities for therapeutic intervention. *J Allergy Clin Immunol* 2000;105(5):860-76.
35. Friedmann PS HC. Atopic dermatitis. In: Burns T BS, Cox N and Griffiths C, editor. *Rook's Textbook of Dermatology 7th Edition*: Blackwell Publishing, 2004:18.1-18.26.
36. Hamid Q, Naseer T, Minshall EM, Song YL, Boguniewicz M, Leung DY. In vivo expression of IL-12 and IL-13 in atopic dermatitis. *J Allergy Clin Immunol* 1996;98(1):225-31.
37. Tazawa T, Sugiura H, Sugiura Y, Uehara M. Relative importance of IL-4 and IL-13 in lesional skin of atopic dermatitis. *Arch Dermatol Res* 2004;295(11):459-64.
38. Abramovits W. Atopic dermatitis. *J Am Acad Dermatol* 2005;53(1 Suppl 1):S86-93.
39. Grewe M, Buijnzeel-Koomen CA, Schopf E, Thepen T, Langeveld-Wildschut AG, Ruzicka T, et al. A role for Th1 and Th2 cells in the immunopathogenesis of atopic dermatitis. *Immunol Today* 1998;19(8):359-61.
40. Verhagen J, Akdis M, Traidl-Hoffmann C, Schmid-Grendelmeier P, Hijnen D, Knol EF, et al. Absence of T-regulatory cell expression and function in atopic dermatitis skin. *J Allergy Clin Immunol* 2006;117(1):176-83.
41. Akdis M, Blaser K, Akdis CA. T regulatory cells in allergy: novel concepts in the pathogenesis, prevention, and treatment of allergic diseases. *J Allergy Clin Immunol* 2005;116(5):961-8; quiz 969.
42. Esche C, de Benedetto A, Beck LA. Keratinocytes in atopic dermatitis: inflammatory signals. *Curr Allergy Asthma Rep* 2004;4(4):276-84.
43. Leung DY, Boguniewicz M, Howell MD, Nomura I, Hamid QA. New insights into atopic dermatitis. *J Clin Invest* 2004;113(5):651-7.
44. Leung DY, Soter NA. Cellular and immunologic mechanisms in atopic dermatitis. *J Am Acad Dermatol* 2001;44(1 Suppl):S1-S12.
45. Robert C, Kupper TS. Inflammatory skin diseases, T cells, and immune surveillance. *N Engl J Med* 1999;341(24):1817-28.
46. Trautmann A, Akdis M, Blaser K, Akdis CA. Role of dysregulated apoptosis in atopic dermatitis. *Apoptosis* 2000;5(5):425-9.
47. Hara J, Higuchi K, Okamoto R, Kawashima M, Imokawa G. High-expression of sphingomyelin deacylase is an important determinant of ceramide deficiency leading to barrier disruption in atopic dermatitis. *J Invest Dermatol* 2000;115(3):406-13.
48. Ong PY, Ohtake T, Brandt C, Strickland I, Boguniewicz M, Ganz T, et al. Endogenous antimicrobial peptides and skin infections in atopic dermatitis. *N Engl J Med* 2002;347(15):1151-60.
49. Yoo J, Omori M, Gyarmati D, Zhou B, Aye T, Brewer A, et al. Spontaneous atopic dermatitis in mice expressing an inducible thymic stromal lymphopoietin transgene specifically in the skin. *J Exp Med*

50. Li M, Messaddeq N, Teletin M, Pasquali JL, Metzger D, Chambon P. Retinoid X receptor ablation in adult mouse keratinocytes generates an atopic dermatitis triggered by thymic stromal lymphopoietin. *Proc Natl Acad Sci U S A* 2005;102(41):14795-800.
51. Mudde GC, Van Reijssen FC, Boland GJ, de Gast GC, Bruijnzeel PL, Bruijnzeel-Koomen CA. Allergen presentation by epidermal Langerhans' cells from patients with atopic dermatitis is mediated by IgE. *Immunology* 1990;69(3):335-41.
52. Wollenberg A, Kraft S, Hanau D, Bieber T. Immunomorphological and ultrastructural characterization of Langerhans cells and a novel, inflammatory dendritic epidermal cell (IDEC) population in lesional skin of atopic eczema. *J Invest Dermatol* 1996;106(3):446-53.
53. Wollenberg A, Wagner M, Gunther S, Towarowski A, Tuma E, Moderer M, et al. Plasmacytoid dendritic cells: a new cutaneous dendritic cell subset with distinct role in inflammatory skin diseases. *J Invest Dermatol* 2002;119(5):1096-102.
54. Cooper D, Hales J, Camp R. IgE-dependent activation of T cells by allergen in atopic dermatitis: pathophysiologic relevance. *J Invest Dermatol* 2004;123(6):1086-91.
55. Beltrani VS. Suggestions regarding a more appropriate understanding of atopic dermatitis. *Curr Opin Allergy Clin Immunol* 2005;5(5):413-8.
56. Barnetson RS, Rogers M. Childhood atopic eczema. *Bmj* 2002;324(7350):1376-9.
57. Isolauri E, Turjanmaa K. Combined skin prick and patch testing enhances identification of food allergy in infants with atopic dermatitis. *J Allergy Clin Immunol* 1996;97(1 Pt 1):9-15.
58. Majamaa H, Seppala U, Palosuo T, Turjanmaa K, Kalkkinen N, Reunala T. Positive skin and oral challenge responses to potato and occurrence of immunoglobulin E antibodies to patatin (Sol t 1) in infants with atopic dermatitis. *Pediatr Allergy Immunol* 2001;12(5):283-8.
59. Roehr CC, Reibel S, Ziegert M, Sommerfeld C, Wahn U, Niggemann B. Atopy patch tests, together with determination of specific IgE levels, reduce the need for oral food challenges in children with atopic dermatitis. *J Allergy Clin Immunol* 2001;107(3):548-53.
60. Tan BB, Weald D, Strickland I, Friedmann PS. Double-blind controlled trial of effect of housedust-mite allergen avoidance on atopic dermatitis. *Lancet* 1996;347(8993):15-8.
61. Gutgesell C, Heise S, Seubert S, Seubert A, Domhof S, Brunner E, et al. Double-blind placebo-controlled house dust mite control measures in adult patients with atopic dermatitis. *Br J Dermatol* 2001;145(1):70-4.
62. Leung DY. Infection in atopic dermatitis. *Curr Opin Pediatr* 2003;15(4):399-404.
63. Guzik TJ, Bzowska M, Kasproicz A, Czerniawska-Mysik G, Wojcik K, Szmyd D, et al. Persistent skin colonization with *Staphylococcus aureus* in atopic dermatitis: relationship to clinical and immunological parameters. *Clin Exp Allergy* 2005;35(4):448-55.
64. Lehmann HS, Heaton T, Mallon D, Holt PG. Staphylococcal enterotoxin-B-mediated stimulation of interleukin-13 production as a potential aetiologic factor in eczema in infants. *Int Arch Allergy Immunol* 2004;135(4):306-12.
65. Howell MD, Novak N, Bieber T, Pastore S, Girolomoni G, Boguniewicz M, et al. Interleukin-10 downregulates anti-microbial peptide expression in atopic dermatitis. *J Invest Dermatol* 2005;125(4):738-45.
66. Wright RJ, Cohen RT, Cohen S. The impact of stress on the development and expression of atopy. *Curr Opin Allergy Clin Immunol* 2005;5(1):23-9.
67. Hashizume H, Horibe T, Ohshima A, Ito T, Yagi H, Takigawa M. Anxiety accelerates T-helper 2-tilted immune responses in patients with atopic dermatitis. *Br J Dermatol* 2005;152(6):1161-4.
68. Schultz Larsen F. Atopic dermatitis: a genetic-epidemiologic study in a population-based twin sample. *J Am Acad Dermatol* 1993;28(5 Pt 1):719-23.
69. Larsen FS, Holm NV, Henningsen K. Atopic dermatitis. A genetic-epidemiologic study in a population-based twin sample. *J Am Acad Dermatol* 1986;15(3):487-94.
70. Kaiser HB. Risk factors in allergy/asthma. *Allergy Asthma Proc* 2004;25(1):7-10.
71. Bohme M, Wickman M, Lennart Nordvall S, Svartengren M, Wahlgren CF. Family history and risk of atopic dermatitis in children up to 4 years. *Clin Exp Allergy* 2003;33(9):1226-31.
72. Wadonda-Kabondo N, Sterne JA, Golding J, Kennedy CT, Archer CB, Dunnill MG. Association of parental eczema, hayfever, and asthma with atopic dermatitis in infancy: birth cohort study. *Arch Dis Child* 2004;89(10):917-21.
73. Moore MM, Rifas-Shiman SL, Rich-Edwards JW, Kleinman KP, Camargo CA, Jr., Gold DR, et al. Perinatal predictors of atopic dermatitis occurring in the first six months of life. *Pediatrics* 2004;113(3 Pt 1):468-74.
74. Farrall M. Quantitative genetic variation: a post-modern view. *Hum Mol Genet* 2004;13 Spec No 1:R1-7.
75. Sandford AJ, Shirakawa T, Moffatt MF, Daniels SE, Ra C, Faux JA, et al. Localisation of atopy and beta subunit of high-affinity IgE receptor (Fc epsilon R1) on chromosome 11q. *Lancet* 1993;341(8841):332-4.

76. Coleman R, Trembath RC, Harper JI. Chromosome 11q13 and atopy underlying atopic eczema. *Lancet* 1993;341(8853):1121-2.
77. Soderhall C, Bradley M, Kockum I, Wahlgren CF, Luthman H, Nordenskjold M. Linkage and association to candidate regions in Swedish atopic dermatitis families. *Hum Genet* 2001;109(2):129-35.
78. Hoffjan S, Epplen JT. The genetics of atopic dermatitis: recent findings and future options. *J Mol Med* 2005;83(9):682-92.
79. Iwanaga T, McEuen A, Walls AF, Clough JB, Keith TP, Rorke S, et al. Polymorphism of the mast cell chymase gene (CMA1) promoter region: lack of association with asthma but association with serum total immunoglobulin E levels in adult atopic dermatitis. *Clin Exp Allergy* 2004;34(7):1037-42.
80. Weidinger S, Rummeler L, Klopp N, Wagenpfeil S, Baurecht HJ, Fischer G, et al. Association study of mast cell chymase polymorphisms with atopy. *Allergy* 2005;60(10):1256-61.
81. Arima K, Umeshita-Suyama R, Sakata Y, Akaiwa M, Mao XQ, Enomoto T, et al. Upregulation of IL-13 concentration in vivo by the IL13 variant associated with bronchial asthma. *J Allergy Clin Immunol* 2002;109(6):980-7.
82. Cookson W. The immunogenetics of asthma and eczema: a new focus on the epithelium. *Nat Rev Immunol* 2004;4(12):978-88.
83. Veal CD, Reynolds NJ, Meggitt SJ, Allen MH, Lindgren CM, Kere J, et al. Absence of association between asthma and high serum immunoglobulin E associated GPRA haplotypes and adult atopic dermatitis. *J Invest Dermatol* 2005;125(2):399-401.
84. Chavanas S, Bodemer C, Rochat A, Hamel-Teillac D, Ali M, Irvine AD, et al. Mutations in SPINK5, encoding a serine protease inhibitor, cause Netherton syndrome. *Nat Genet* 2000;25(2):141-2.
85. Walley AJ, Chavanas S, Moffatt MF, Esnouf RM, Ubhi B, Lawrence R, et al. Gene polymorphism in Netherton and common atopic disease. *Nat Genet* 2001;29(2):175-8.
86. Kato A, Fukai K, Oiso N, Hosomi N, Murakami T, Ishii M. Association of SPINK5 gene polymorphisms with atopic dermatitis in the Japanese population. *Br J Dermatol* 2003;148(4):665-9.
87. Nishio Y, Noguchi E, Shibasaki M, Kamioka M, Ichikawa E, Ichikawa K, et al. Association between polymorphisms in the SPINK5 gene and atopic dermatitis in the Japanese. *Genes Immun* 2003;4(7):515-7.
88. Kabesch M, Carr D, Weiland SK, von Mutius E. Association between polymorphisms in serine protease inhibitor, kazal type 5 and asthma phenotypes in a large German population sample. *Clin Exp Allergy* 2004;34(3):340-5.
89. Folster-Holst R, Stoll M, Koch WA, Hampe J, Christophers E, Schreiber S. Lack of association of SPINK5 polymorphisms with nonsyndromic atopic dermatitis in the population of Northern Germany. *Br J Dermatol* 2005;152(6):1365-7.
90. Komatsu N, Takata M, Otsuki N, Ohka R, Amano O, Takehara K, et al. Elevated stratum corneum hydrolytic activity in Netherton syndrome suggests an inhibitory regulation of desquamation by SPINK5-derived peptides. *J Invest Dermatol* 2002;118(3):436-43.
91. Takahashi N, Akahoshi M, Matsuda A, Ebe K, Inomata N, Obara K, et al. Association of the IL12RB1 promoter polymorphisms with increased risk of atopic dermatitis and other allergic phenotypes. *Hum Mol Genet* 2005;14(21):3149-59.
92. Novak N, Kruse S, Potreck J, Maintz L, Jenneck C, Weidinger S, et al. Single nucleotide polymorphisms of the IL18 gene are associated with atopic eczema. *J Allergy Clin Immunol* 2005;115(4):828-33.
93. Nickel RG, Casolaro V, Wahn U, Beyer K, Barnes KC, Plunkett BS, et al. Atopic dermatitis is associated with a functional mutation in the promoter of the C-C chemokine RANTES. *J Immunol* 2000;164(3):1612-6.
94. Kozma GT, Falus A, Bojszko A, Krikovszky D, Szabo T, Nagy A, et al. Lack of association between atopic eczema/dermatitis syndrome and polymorphisms in the promoter region of RANTES and regulatory region of MCP-1. *Allergy* 2002;57(2):160-3.
95. Weidinger S, Klopp N, Rummeler L, Wagenpfeil S, Novak N, Baurecht HJ, et al. Association of NOD1 polymorphisms with atopic eczema and related phenotypes. *J Allergy Clin Immunol* 2005;116(1):177-84.
96. Vasilopoulos Y, Cork MJ, Murphy R, Williams HC, Robinson DA, Duff GW, et al. Genetic association between an AACC insertion in the 3'UTR of the stratum corneum chymotryptic enzyme gene and atopic dermatitis. *J Invest Dermatol* 2004;123(1):62-6.
97. Shimizu M, Matsuda A, Yanagisawa K, Hirota T, Akahoshi M, Inomata N, et al. Functional SNPs in the distal promoter of the ST2 gene are associated with atopic dermatitis. *Hum Mol Genet* 2005;14(19):2919-27.
98. Lee YA, Wahn U, Kehrt R, Tarani L, Businco L, Gustafsson D, et al. A major susceptibility locus for atopic dermatitis maps to chromosome 3q21. *Nat Genet* 2000;26(4):470-3.
99. Cookson WO, Ubhi B, Lawrence R, Abecasis GR, Walley AJ, Cox HE, et al. Genetic linkage of childhood atopic dermatitis to psoriasis susceptibility loci. *Nat Genet* 2001;27(4):372-3.

100. Bradley M, Soderhall C, Luthman H, Wahlgren CF, Kockum I, Nordenskjold M. Susceptibility loci for atopic dermatitis on chromosomes 3, 13, 15, 17 and 18 in a Swedish population. *Hum Mol Genet* 2002;11(13):1539-48.
101. Haagerup A, Bjerke T, Schiøtz PO, Dahl R, Binderup HG, Tan Q, et al. Atopic dermatitis -- a total genome-scan for susceptibility genes. *Acta Derm Venereol* 2004;84(5):346-52.
102. Morar N, Bowcock AM, Harper JI, Cookson WO, Moffatt MF. Investigation of the Chromosome 17q25 PSORS2 Locus in Atopic Dermatitis. *J Invest Dermatol* 2006.
103. Sugiura H, Ebise H, Tazawa T, Tanaka K, Sugiura Y, Uehara M, et al. Large-scale DNA microarray analysis of atopic skin lesions shows overexpression of an epidermal differentiation gene cluster in the alternative pathway and lack of protective gene expression in the cornified envelope. *Br J Dermatol* 2005;152(1):146-9.
104. Nomura I, Gao B, Boguniewicz M, Darst MA, Travers JB, Leung DY. Distinct patterns of gene expression in the skin lesions of atopic dermatitis and psoriasis: a gene microarray analysis. *J Allergy Clin Immunol* 2003;112(6):1195-202.
105. Saito H. Much atopy about the skin: genome-wide molecular analysis of atopic eczema. *Int Arch Allergy Immunol* 2005;137(4):319-25.
106. Hirschhorn JN, Daly MJ. Genome-wide association studies for common diseases and complex traits. *Nat Rev Genet* 2005;6(2):95-108.
107. Farrall M, Morris AP. Gearing up for genome-wide gene-association studies. *Hum Mol Genet* 2005;14 Spec No. 2:R157-62.
108. Hoare C, Li Wan Po A, Williams H. Systematic review of treatments for atopic eczema. *Health Technol Assess* 2000;4(37):1-191.
109. Lucky AW, Leach AD, Laskarzewski P, Wenck H. Use of an emollient as a steroid-sparing agent in the treatment of mild to moderate atopic dermatitis in children. *Pediatr Dermatol* 1997;14(4):321-4.
110. Thomas KS, Armstrong S, Avery A, Po AL, O'Neill C, Young S, et al. Randomised controlled trial of short bursts of a potent topical corticosteroid versus prolonged use of a mild preparation for children with mild or moderate atopic eczema. *Bmj* 2002;324(7340):768.
111. Berth-Jones J, Damstra RJ, Golsch S, Livden JK, Van Hoogheem O, Allegra F, et al. Twice weekly fluticasone propionate added to emollient maintenance treatment to reduce risk of relapse in atopic dermatitis: randomised, double blind, parallel group study. *Bmj* 2003;326(7403):1367.
112. Garside R, Stein K, Castelnovo E, Pitt M, Ashcroft D, Dimmock P, et al. The effectiveness and cost-effectiveness of pimecrolimus and tacrolimus for atopic eczema: a systematic review and economic evaluation. *Health Technol Assess* 2005;9(29):iii, xi-xiii, 1-230.
113. Ashcroft DM, Dimmock P, Garside R, Stein K, Williams HC. Efficacy and tolerability of topical pimecrolimus and tacrolimus in the treatment of atopic dermatitis: meta-analysis of randomised controlled trials. *Bmj* 2005;330(7490):516.
114. Reitamo S, Ortonne JP, Sand C, Cambazard F, Bieber T, Folster-Holst R, et al. A multicentre, randomized, double-blind, controlled study of long-term treatment with 0.1% tacrolimus ointment in adults with moderate to severe atopic dermatitis. *Br J Dermatol* 2005;152(6):1282-9.
115. Fonacier L, Spergel J, Charlesworth EN, Weldon D, Beltrani V, Bernhisel-Broadbent J, et al. Report of the Topical Calcineurin Inhibitor Task Force of the American College of Allergy, Asthma and Immunology and the American Academy of Allergy, Asthma and Immunology. *J Allergy Clin Immunol* 2005;115(6):1249-53.
116. Reynolds NJ, Franklin V, Gray JC, Diffey BL, Farr PM. Narrow-band ultraviolet B and broad-band ultraviolet A phototherapy in adult atopic eczema: a randomised controlled trial. *Lancet* 2001;357(9273):2012-6.
117. Krutmann J, Diepgen TL, Luger TA, Grabbe S, Meffert H, Sonnichsen N, et al. High-dose UVA1 therapy for atopic dermatitis: results of a multicenter trial. *J Am Acad Dermatol* 1998;38(4):589-93.
118. Legat FJ, Hofer A, Brabek E, Quehenberger F, Kerl H, Wolf P. Narrowband UV-B vs medium-dose UV-A1 phototherapy in chronic atopic dermatitis. *Arch Dermatol* 2003;139(2):223-4.
119. Sowden JM, Berth-Jones J, Ross JS, Motley RJ, Marks R, Finlay AY, et al. Double-blind, controlled, crossover study of cyclosporin in adults with severe refractory atopic dermatitis. *Lancet* 1991;338(8760):137-40.
120. Salek MS, Finlay AY, Luscombe DK, Allen BR, Berth-Jones J, Camp RD, et al. Cyclosporin greatly improves the quality of life of adults with severe atopic dermatitis. A randomized, double-blind, placebo-controlled trial. *Br J Dermatol* 1993;129(4):422-30.
121. Granlund H, Erkkö P, Reitamo S. Long-term follow-up of eczema patients treated with cyclosporine. *Acta Derm Venereol* 1998;78(1):40-3.
122. Harper JI, Ahmed I, Barclay G, Lacour M, Hoeger P, Cork MJ, et al. Cyclosporin for severe childhood atopic dermatitis: short course versus continuous therapy. *Br J Dermatol* 2000;142(1):52-8.
123. Kirby B, Owen CM, Blewitt RW, Yates VM. Cutaneous T-cell lymphoma developing in a patient on cyclosporin therapy. *J Am Acad Dermatol* 2002;47(2 Suppl):S165-7.

124. Sinha A, Velangi S, Natarajan S. Non-Hodgkin's lymphoma following treatment of atopic eczema with cyclosporin A. *Acta Derm Venereol* 2004;84(4):327-8.
125. Meggitt SJ, Reynolds NJ. Azathioprine for atopic dermatitis. *Clin Exp Dermatol* 2001;26(5):369-75.
126. Berth-Jones J, Takwale A, Tan E, Barclay G, Agarwal S, Ahmed I, et al. Azathioprine in severe adult atopic dermatitis: a double-blind, placebo-controlled, crossover trial. *Br J Dermatol* 2002;147(2):324-30.
127. Meggitt SJ, Gray JC, Reynolds NJ. Azathioprine dosed by thiopurine methyltransferase activity for moderate-to-severe atopic eczema. *Lancet* 2006(in press).
128. Murphy LA, Atherton D. A retrospective evaluation of azathioprine in severe childhood atopic eczema, using thiopurine methyltransferase levels to exclude patients at high risk of myelosuppression. *Br J Dermatol* 2002;147(2):308-15.
129. Anstey AV, Wakelin S, Reynolds NJ. Guidelines for prescribing azathioprine in dermatology. *Br J Dermatol* 2004;151(6):1123-32.
130. Evans WE, Hon YY, Bomgaars L, Coutre S, Holdsworth M, Janco R, et al. Preponderance of thiopurine S-methyltransferase deficiency and heterozygosity among patients intolerant to mercaptopurine or azathioprine. *J Clin Oncol* 2001;19(8):2293-301.
131. Connell WR, Kamm MA, Dickson M, Balkwill AM, Ritchie JK, Lennard-Jones JE. Long-term neoplasia risk after azathioprine treatment in inflammatory bowel disease. *Lancet* 1994;343(8908):1249-52.
132. Kwon JH, Farrell RJ. The risk of lymphoma in the treatment of inflammatory bowel disease with immunosuppressive agents. *Crit Rev Oncol Hematol* 2005;56(1):169-78.
133. Neuber K, Schwartz I, Itschert G, Dieck AT. Treatment of atopic eczema with oral mycophenolate mofetil. *Br J Dermatol* 2000;143(2):385-91.
134. Grundmann-Kollmann M, Podda M, Ochsendorf F, Boehncke WH, Kaufmann R, Zollner TM. Mycophenolate mofetil is effective in the treatment of atopic dermatitis. *Arch Dermatol* 2001;137(7):870-3.
135. Jones EL, Epinette WW, Hackney VC, Menendez L, Frost P. Treatment of psoriasis with oral mycophenolic acid. *J Invest Dermatol* 1975;65(6):537-42.
136. Epinette WW, Parker CM, Jones EL, Greist MC. Mycophenolic acid for psoriasis. A review of pharmacology, long-term efficacy, and safety. *J Am Acad Dermatol* 1987;17(6):962-71.
137. Kalliomaki M, Salminen S, Arvilommi H, Kero P, Koskinen P, Isolauri E. Probiotics in primary prevention of atopic disease: a randomised placebo-controlled trial. *Lancet* 2001;357(9262):1076-9.
138. Rosenfeldt V, Benfeldt E, Nielsen SD, Michaelsen KF, Jeppesen DL, Valerius NH, et al. Effect of probiotic Lactobacillus strains in children with atopic dermatitis. *J Allergy Clin Immunol* 2003;111(2):389-95.
